# Supplementary material
Source: PubMed Central journal article supplement (PMC3967039)
Supplement: supp_tpc.114.123240_tpc123240Supplemental.pdf [file supp_tpc.114.123240_tpc123240Supplemental.pdf]

**SUPPLEMENTAL DATA****Supplemental Table 1.** List of oligonucleotides used in this study.

| <b>Oligo</b> | <b>Sequence (5' → 3')</b>                                       |
|--------------|-----------------------------------------------------------------|
| ndhH_F       | ACCATCTAGAGTAACGATGAGTC                                         |
| ndhH_R       | TGACTGCACCAACTACAAGAAA                                          |
| psaJ_F       | AACATATCTCTCTGTGGCACC                                           |
| psaJ_R       | AAGGGGAATGTCAACGCA                                              |
| rps11_F      | TACGGATAGCGTTTGCTGCT                                            |
| rps11_R      | CACGTAAGGGTGCACGTAGA                                            |
| 16S_F        | GAGAGTTCGATCCTGGCTCA                                            |
| 16S_R        | GCACCTTCCAGTACGGCTAC                                            |
| 23S_F        | AGGAAAGGCTTACGGTGGAT                                            |
| 23S_R        | TGGGCACGATAACTGGTACA                                            |
| 36-aphfor    | TTTGTACATCGGCTCTTCTGGCAAGTCTGATTAATTCAATTCATCAA<br>GTTTTAAAAAAT |
| 36-2aphrev   | GGAATGAGAAATTATGGAATTACCAAATATTATTCAAC                          |
| 36-2inffor   | GGTAATTCCATATTTCTCATTCTTACCTTAATTC                              |
| 36-2rps8rev  | TCTAATTATCAACGAATTCCG                                           |
| P5'psaA      | CCAGTTGAGATGGGATATGATTG                                         |
| P3'psaA      | CAGTAACTGGGGGTCTGTGG                                            |
